# Supplementary material for: Systematic Review of Pooling Sputum as an Efficient Method for Xpert MTB/RIF Tuberculosis Testing during the COVID-19 Pandemic
Source: PubMed Central journal article supplement (PMC7920689; doi:10.3201/eid2703.204090), 2021-03
Supplement: 20-4090-Techapp-s1.pdf [file 20-4090-Techapp-s1.pdf]

# Systematic Review of Pooling Sputum as an Efficient Method for Xpert MTB/RIF Tuberculosis Testing during the COVID-19 Pandemic

## Appendix

**Appendix Table.** Full search strategy for literature to be included in systematic review

| Database       | Query                                                                                                                           | Items found |
|----------------|---------------------------------------------------------------------------------------------------------------------------------|-------------|
| PubMed/Medline | "GeneXpert"[All Fields] OR "Ultra"[All Fields] AND "tuberculos*"[All Fields] AND "pool*"[All Fields] AND "diagnos*"[All Fields] | 8           |
| Web of Science | ((GeneXpert OR Ultra) AND Tuberculos* AND Pool* AND Diagnos*)                                                                   | 16          |
| Global Health  | GeneXpert AND Tuberculos* AND Pool* AND Diagnos*                                                                                | 5           |
| Cinahl         | GeneXpert AND Tuberculos* AND Pool* AND Diagnos*                                                                                | 4           |

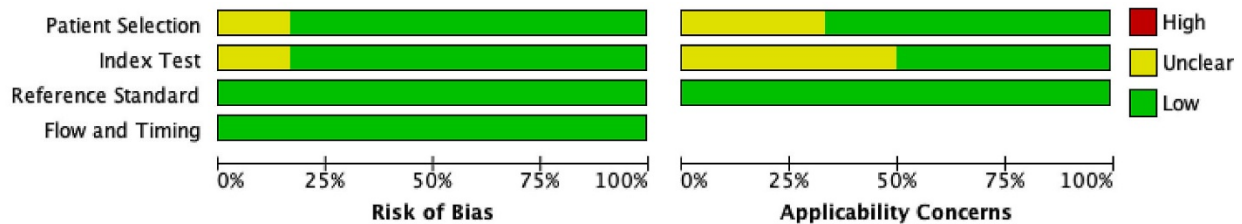

**Appendix Figure 1.** Risk-of-bias and applicability concerns graphs of included studies on Pooling Xpert test. Each methodological quality item is presented as percentages across all included studies. Figure was generated using Review Manager Version 5.3; Cochrane Collaboration.

|                   | Risk of bias      |            |                    |                 | Applicability concerns |            |                    |
|-------------------|-------------------|------------|--------------------|-----------------|------------------------|------------|--------------------|
|                   | Patient selection | Index test | Reference standard | Flow and timing | Patient selection      | Index test | Reference standard |
| Abdurrahman, 2015 | +                 | +          | +                  | +               | +                      | +          | +                  |
| Chry, 2020        | +                 | +          | +                  | +               | +                      | ?          | +                  |
| Ho, 2017          | ?                 | +          | +                  | +               | ?                      | ?          | +                  |
| Phuong, 2019      | +                 | +          | +                  | +               | +                      | +          | +                  |
| Santos, 2019      | +                 | +          | +                  | +               | +                      | +          | +                  |
| Zishiri, 2014     | +                 | ?          | +                  | +               | ?                      | ?          | +                  |

**Appendix Figure 2.** Summary for risk of bias of included studies on Pooling Xpert test. The green symbols represent low risk of bias, the yellow symbols represent unclear risk of bias, and the red symbols represent high risk of bias. The figure was generated using Review Manager Version 5.3; Cochrane Collaboration.
